# Supplementary material for: Are big data analytics helpful in caring for multimorbid patients in general practice? - A scoping review
Source: PubMed Central journal article supplement (PMC6394098; doi:10.1186/s12875-019-0928-5), 2019-02-27
Supplement: 12875_2019_928_MOESM1_ESM.pdf [file 12875_2019_928_MOESM1_ESM.pdf]

## Additional File 1: Detailed Information on search strategy

### a) Search Strategy

|                           |             |
|---------------------------|-------------|
| Big data                  | multimorb*  |
| Health analytics          | multi-morb* |
| Healthcare informatics    |             |
| Electronic health records |             |
| Databases                 |             |
| data collection system    |             |
| electronic data capture   |             |
| data management system    |             |
| deep learning             |             |
| electronic medical record |             |
| machine learning          |             |
| medical data              |             |
| huge data                 |             |
| electronic patient record |             |
| datamining                |             |
| data analysis             |             |
| reinforcement learning    |             |
| decision support system   |             |
| predictive analytics      |             |
| reasoning                 |             |
| Inference                 |             |

Search term:

((((((((((((((((((((((((Big data) OR Health analytics) OR Healthcare informatics) OR Electronic health records) OR Databases) OR data collection system) OR electronic data capture) OR data management system) OR deep learning) OR electronic medical record) OR machine learning) OR medical data) OR huge data) OR electronic patient record) OR datamining) OR data analysis) OR reinforcement learning) OR decision support system) OR predictive analytics) OR reasoning) OR Inference) AND ((multimorb\*) OR multi-morb\*)

### b) Detailed Information about the search results

|                           |                     |
|---------------------------|---------------------|
| PubMed                    | 1.701 hits          |
| Web of Science            | 1.162 hits          |
| Cochrane Library          | 70 hits             |
| Grey Literature           | 220 hits            |
| <b>Total:</b>             | <b>3.153 hits</b>   |
| <u>Removed duplicates</u> | <u>761</u>          |
| <b>Screened articles</b>  | <b><u>2.392</u></b> |

Date of most recent search executed: 29<sup>th</sup> of August 2018

**c) Table of exclusion criteria for full texts**

|                                                                                 |                  |
|---------------------------------------------------------------------------------|------------------|
| Not big data as predefined                                                      | 14               |
| Focus of article was not the use of big data in the treatment of multimorbidity | 5                |
| Full Text was not retrievable                                                   | 2                |
| Focus of article was not the treatment of multimorbidity                        | 1                |
| <b>Total number of excluded full texts</b>                                      | <b><u>22</u></b> |
